# Supplementary material for: Self-Assembly of Copper Oxide Interfaced MnO2 for Oxygen Evolution Reaction
Source: MDPI journal article supplement (doi:10.3390/nano13162329), 2023-08-13
Supplement: s1 [file s1]

## Supporting Information

### Self-assembly of copper oxide interfaced MnO<sub>2</sub> for Oxygen evolution reaction

Chinna Bathula<sup>1</sup>, Abhishek Meena<sup>2</sup>, Sankar Sekar<sup>3,4</sup>, Aditya Narayan Singh<sup>5</sup>, Ritesh Soni<sup>6</sup>, Adel El-Marghany<sup>7</sup>, Ramasubba Reddy Palem<sup>8</sup>, Hyun-Seok Kim<sup>1\*</sup>

<sup>1</sup>*Division of Electronics and Electrical Engineering, Dongguk University-Seoul, Seoul 04620, Republic of Korea*

<sup>2</sup>*Division of Physics and Semiconductor Science, Dongguk University-Seoul, Seoul 04620, Republic of Korea.*

<sup>3</sup>*Department of Semiconductor Science, Dongguk University-Seoul, Seoul 04620, Republic of Korea*

<sup>4</sup>*Quantum-functional Semiconductor Research Center, Dongguk University-Seoul, Seoul 04620, Republic of Korea*

<sup>5</sup>*Department of Energy and Materials Engineering, Dongguk University-Seoul, Seoul 04620, Republic of Korea*

<sup>6</sup>*Department of Chemical Engineering, Department of Energy Engineering, Ulsan National Institute of Science and Technology (UNIST), 50 UNIST-gil, Ulsan 44919, Republic of Korea*

<sup>7</sup>*Department of Chemistry, College of Science, King Saud University, P.O. Box 2455, Riyadh 11451, Saudi Arabia;*

<sup>8</sup>*Department of Medical Biotechnology, Dongguk University, 32 Dongguk-ro, Ilsandong-gu, Goyang, Gyeonggi 10326, Republic of Korea*

Corresponding Author Email: hyunseokk@dongguk.edu

## Index

| SI. No.          | Content                                                                      | Page No. |
|------------------|------------------------------------------------------------------------------|----------|
| 1                | Characterization                                                             | S3       |
| <b>Fig. S1.</b>  | XPS survey plot for CuO/MnO <sub>2</sub>                                     | S5       |
| <b>Fig. S2.</b>  | (a) Over potential, (b) Tafel slope of CuO and CuO/MnO <sub>2</sub>          | S6       |
| <b>Fig. S3.</b>  | (a)XRD after OEF for CuO/MnO <sub>2</sub> , (a) SEM image After OER          | S7       |
| <b>Table S1.</b> | Electrochemical impedance spectroscopy data for CuO and CuO/MnO <sub>2</sub> | S8       |
| <b>Table S2</b>  | Comparative table for electrochemical OER performances                       | S9       |
| <b>Fig. S4.</b>  | The LSV polarization curve for IrO <sub>2</sub> catalyst.                    | S10      |
|                  | References                                                                   | S11      |

## **1. Characterization**

### **1.1. X-ray diffraction (XRD) Analysis**

The XRD patterns were obtained with a RU-200B, Rigaku Rotaflex X-ray diffractometer with Cu K $\alpha$  ( $\lambda=0.15406$  nm) radiation; the spectra were obtained at a  $2\theta$  range of 10 to 60° at a scan rate of 2° per minute.

### **1.2. Brunauer-Emmett-Teller (BET) and Barrett-Joyner-Halenda (BJH) analysis**

The surface areas (BET) and pore size distribution (BJH) parameters were studied using N<sub>2</sub> adsorption–desorption isotherms studied on a Micromeritics (ASAP-2010) instrument at 77 K.

### **1.3. X-ray photoelectron spectroscopy (XPS) analysis**

The elemental analysis of the composites was conducted via the XPS (ESCALAB 250Xi, Thermo Scientific) coupled with an Al K $\alpha$  (100 to 3keV) source.

### **1.4. Scanning electron microscopy (SEM) and transmission electron microscopy (TEM)**

The nanostructure and morphological features of were studied via different electron microscopies such as SEM (COXEM: CX-200TM, KOREA, at 20 keV), FE-TEM (S-4800, JEOLJEM-2010F, Hitachi), and SAED patterns.

### **1.5. Energy dispersive spectrometry (EDS) mapping**

The EDX elemental mapping images were acquired with an S-4300SE microscope.

### **1.6. Electrochemical analysis**

In this study, we investigated the electrochemical properties of the catalyst using a VSP instrument (Bio Logic Science Instruments, Inc.) in a three-electrode system at room temperature, with 1 M KOH as the electrolyte. The working electrode was prepared by drop casting the catalyst onto a NF substrate (1x1 cm<sup>2</sup>), while a graphitic rod was employed

as the counter electrode and a Hg/HgO electrode as the reference electrode. To ensure reliable measurements, all Hg/HgO potentials were converted to values relative to a reversible hydrogen electrode (RHE) using the following equation:

$$E_{(\text{RHE})} = E_{(\text{Hg/HgO})} + 0.915$$

To improve the accuracy of the results, all data presented in this study were corrected for series resistance ( $R_s$ ).

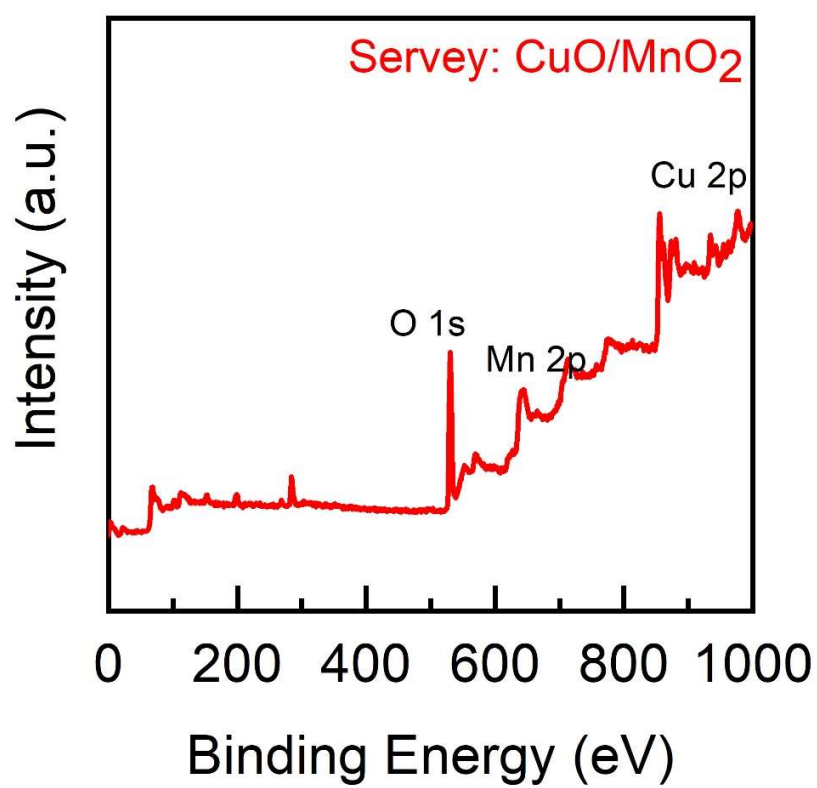

**Fig. S1.** XPS survey plot for CuO/MnO<sub>2</sub>

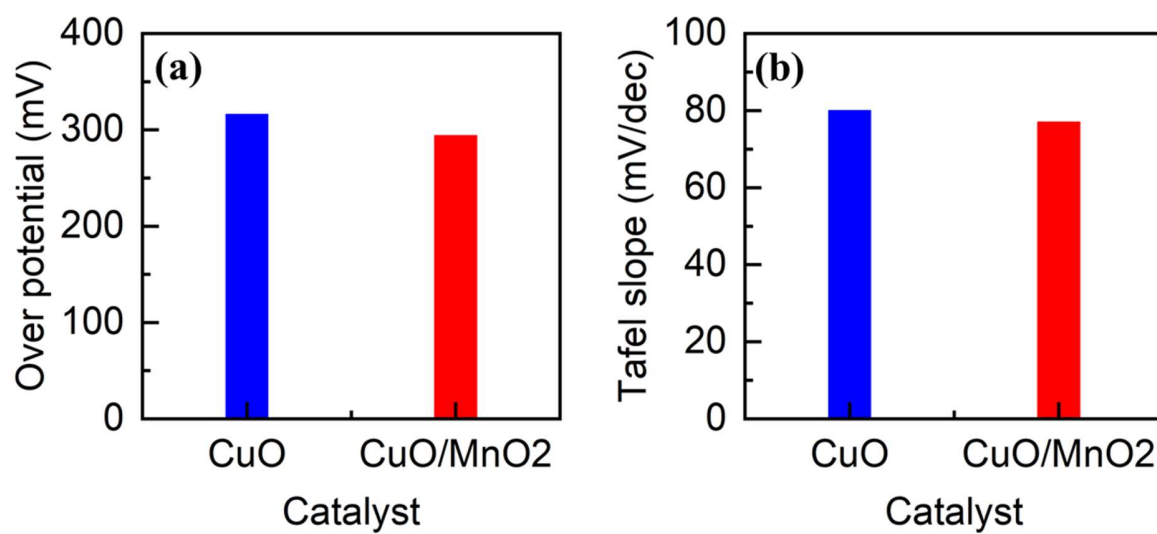

**Fig. S2.** (a) Over potential, (b) Tafel slope of CuO and CuO/MnO<sub>2</sub>

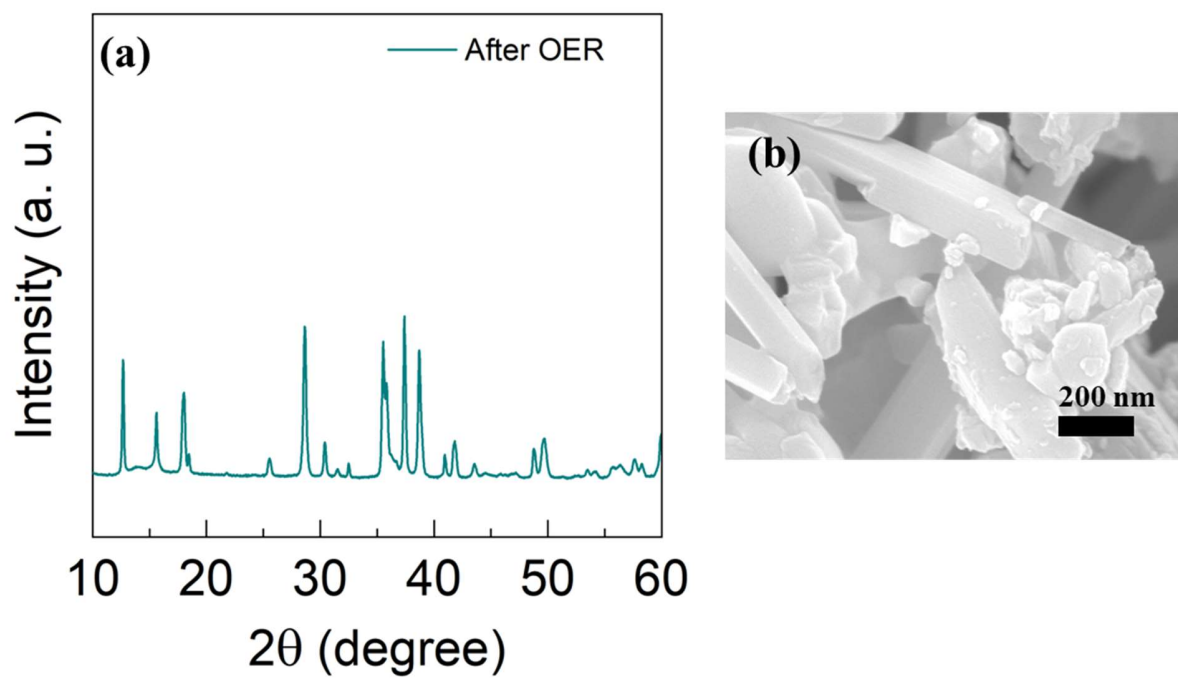

**Fig S3** (a)XRD for CuO/MnO<sub>2</sub> after OER, (a) SEM image After OER

**Table S1.** Electrochemical impedance spectroscopy data for CuO and CuO/MnO<sub>2</sub>

| Sample               | R <sub>s</sub> (Ohm) | R <sub>ct</sub> (Ohm) |
|----------------------|----------------------|-----------------------|
| CuO                  | 1.92                 | 21.77                 |
| CuO/MnO <sub>2</sub> | 1.85                 | 14.38                 |



**Table S2.** Comparative table for electrochemical OER performances

| SI. No | Electrocatalyst                                 | Current density<br>(mA/cm) | Overpotential<br>(mV) | Tafel slope<br>(mV/dec) | Reference    |
|--------|-------------------------------------------------|----------------------------|-----------------------|-------------------------|--------------|
| 1      | CuO nanowire                                    | 10                         | 580                   | 61.4                    | 1            |
| 2      | CuCo <sub>2</sub> S <sub>4</sub>                | 10                         | 310                   | 86                      | 2            |
| 3      | CuCo <sub>2</sub> S <sub>4</sub> /CF            | 60                         | 259                   | 110                     | 3            |
| 4      | CuCo <sub>2</sub> S <sub>4</sub> /CF            | 100                        | 295                   | 110                     | 3            |
| 5      | CuCoO-NWs                                       | 60                         | 320                   | 68                      | 4            |
| 6      | CCO ns                                          | 20                         | 294                   | 117                     | 5            |
| 7      | MnO <sub>2</sub> /CC                            | 50                         | 1027                  | 465                     | 6            |
| 8      | Fe- MnO <sub>2</sub> /CC                        | 50                         | 1148                  | 498                     | 6            |
| 9      | Co-MnO <sub>2</sub> /CC                         | 50                         | 1050                  | 337                     | 6            |
| 10     | Ni-MnO <sub>2</sub> /CC                         | 50                         | 1070                  | 399                     | 6            |
| 11     | IrO <sub>2</sub> /V <sub>2</sub> O <sub>5</sub> | 10                         | 283                   | 34                      | 7            |
| 12     | Ir 18wt% -NiO                                   | 10                         | 215                   | 35                      | 8            |
| 13     | CuO                                             | 10                         | 316                   | 80                      | Present work |
| 14     | CuO/MnO <sub>2</sub>                            | 10                         | 294                   | 77                      | Present work |

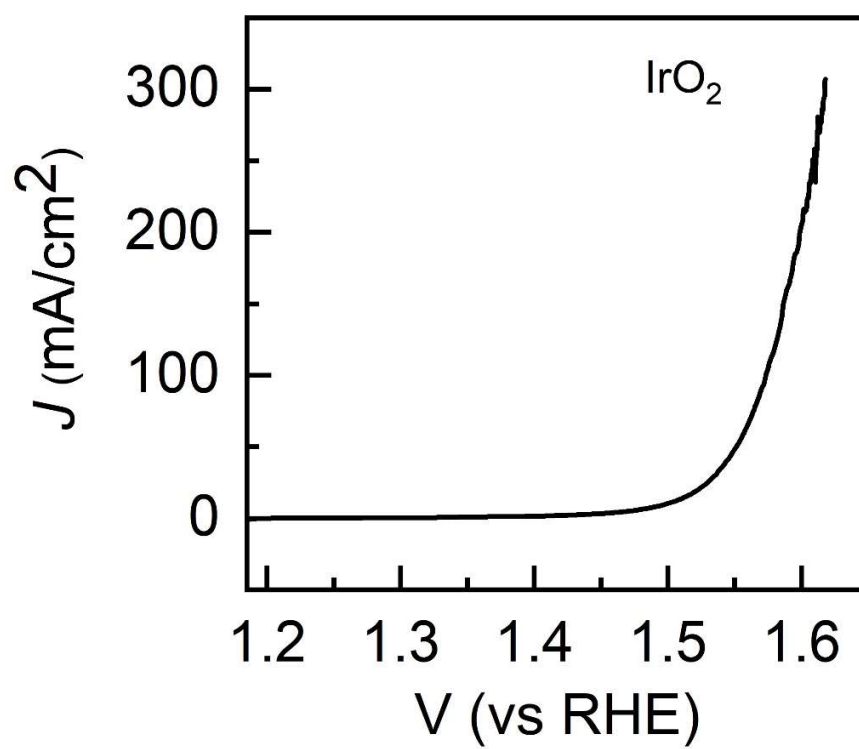

**Figure. S4.** The LSV polarization curve for IrO<sub>2</sub> catalyst.

## References

- [1] X. Liu, S. Cui, Z. Sun, Y. Ren, X. Zhang, P. Du, Self-Supported Copper Oxide Electrocatalyst for Water Oxidation at Low Overpotential and Confirmation of Its Robustness by Cu K-Edge X-ray Absorption Spectroscopy, *J. Phys. Chem. C*, 120 (2016) 831.
- [2] M. Chauhan, K. P. Reddy, C. S. Gopinath, S. Deka, Copper Cobalt Sulfide Nanosheets Realizing a Promising Electrocatalytic Oxygen Evolution Reaction, *ACS Catal.* 7 (2017) 5871-5879.
- [3] L. Yang, L. Xie, X. Ren, Z. Wang, Z. Liu, G. Du, A. M. Asiri, Y. Yao, X. Sun, Hierarchical  $\text{CuCo}_2\text{S}_4$  nanoarrays for high-efficient and durable water oxidation electrocatalysis, *Chem. Commun.*, 54 (2018) 78-81.
- [4] M. Kuang, P. Han, Q. Wang, J. Li, G. Zheng, CuCo Hybrid Oxides as Bifunctional Electrocatalyst for Efficient Water Splitting, *Adv. Funct. Mater.*, 26 (2016) 8555-8561.
- [5] A. Ahmed, B. Hou, H. Chavan, Y. Jo, S. Cho, J. Kim, S. Pawar, S. Cha, A. Inamdar, H. Kim, H. Im, Self-Assembled Nanostructured  $\text{CuCo}_2\text{O}_4$  for Electrochemical Energy Storage and the Oxygen Evolution Reaction via Morphology Engineering, *Small*, 14 (2018) 1800742.
- [6] H. Yan, X. Wang, V. Linkov, S. Ji, R. Wang, Wang, Selectivity Evolution Reaction on Carbon Cloth-Supported  $\delta\text{-MnO}_2$  Nanosheets in Electrolysis of Real Seawater, *Molecules* 28 (2023) 854.
- [7] X. Zheng, M. Qin, S. Ma, Y. Chen, H. Ning, R. Yang, S. Mao, Y. Wang, Strong Oxide-Support Interaction over  $\text{IrO}_2/\text{V}_2\text{O}_5$  for Efficient pH-Universal Water Splitting, 9 (2022) 2104636.
- [8] Q. Wang, X. Huang, Z. Liang Zhao, M. Wang, B. Xiang, J. Li, Z. Feng, H. Xu, and M. Gu, Ultrahigh-Loading of Ir Single Atoms on NiO Matrix to Dramatically Enhance Oxygen Evolution Reaction, *J. Am. Chem. Soc.* 142 (2020) 7425–7433.
